# Supplementary material for: Hogweed Seed Oil: Physico–Chemical Characterization, LC-MS Profile, and Neuroprotective Activity of Heracleum dissectum Nanosuspension
Source: MDPI journal article supplement (doi:10.3390/life13051112), 2023-04-29
Supplement: s1 [file s1]

## Article

# Hogweed Seed Oil: Physico-Chemical Characterization, LC-MS Profile, and Neuroprotective Activity of *Heracleum dissectum* Nanosuspension

Daniil N. Olennikov <sup>1,\*</sup> and Nadezhda K. Chirikova <sup>2</sup>

<sup>1</sup> Laboratory of Medical and Biological Research, Institute of General and Experimental Biology, Siberian Division, Russian Academy of Science, 6 Sakhyanovoy Street, 670047 Ulan-Ude, Russia

<sup>2</sup> Department of Biochemistry and Biotechnology, North-Eastern Federal University, 58 Belinsky Street, 677027 Yakutsk, Russia; hofnung@mail.ru

\* Correspondence: olennikovdn@mail.ru; Tel.: +7-902-160-06-27

**Figure S1.** Overlapped FTIR spectra of *H. dissectum* seed oil (black) and impertorin (red), octyl acetate (green), and petroselinic acid (blue).

**Table S1.** Reference standards used for the qualitative and quantitative analysis by HPLC-DAD-ESI-tQ-MS assays.

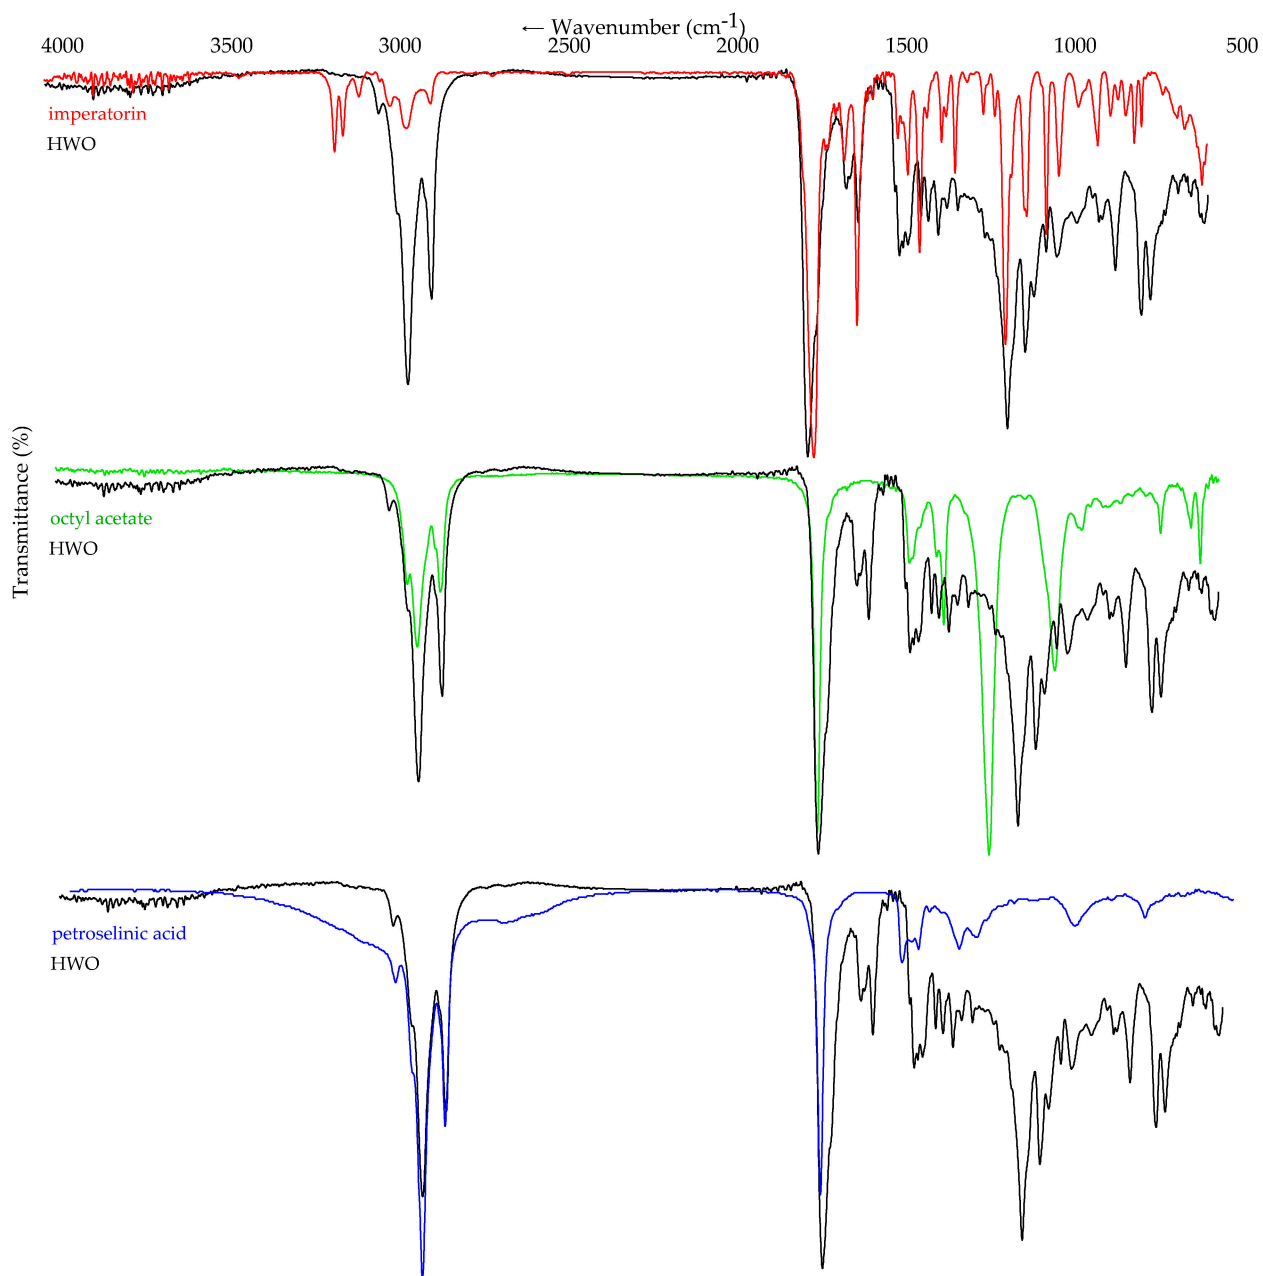

**Figure S1.** Overlapped FTIR spectra of *H. dissectum* seed oil (black) and imperatorin (red), octyl acetate (green), and petroselinic acid (blue).

**Table S1.** Reference standards used for the qualitative and quantitative analysis by HPLC-DAD-ESI-tQ-MS assays.

| No <sup>a</sup> | Compound                           | Standard <sup>a</sup>       | Manufacturer (Cat. no) <sup>b</sup> | Purity, (≥) % |
|-----------------|------------------------------------|-----------------------------|-------------------------------------|---------------|
| 1               | Isofraxetin                        | Fraxetin                    | Selleck (S9503)                     | 99.85         |
| 2               | Esculetin                          | Esculetin                   | Sigma (PHL80449)                    | 95.00         |
| 3               | Umbelliferone                      | Umbelliferone               | Sigma (H24003)                      | 99.00         |
| 4               | Scopoletin                         | Scopoletin                  | Sigma (S2500)                       | 99.00         |
| 5               | Fraxetin                           | Fraxetin                    | Selleck (S9503)                     | 99.85         |
| 6               | Heraclenol                         | Heraclenol                  | Sigma (SMB00125)                    | 95.00         |
| 7               | Oxypeucedanin hydrate              | Oxypeucedanin hydrate       | MCE (HY-N2254)                      | 99.94         |
| 8               | Byakangelicin                      | Byakangelicin               | AOBIOUS (APB0102)                   | 98.00         |
| 9               | Coumarin                           | Coumarin                    | Sigma (C4261)                       | 99.00         |
| 10              | Herniarin                          | Herniarin                   | MCE (HY-N1366)                      | 99.92         |
| 11              | Psoralene                          | Psoralene                   | Sigma (P8399)                       | 99.00         |
| 12              | Angelicin                          | Angelicin                   | MCE (HY-N0763)                      | 99.86         |
| 13              | Xanthotoxin                        | Xanthotoxin                 | Sigma (56448)                       | 98.00         |
| 14              | Bergapten                          | Bergapten                   | Sigma (69664)                       | 99.00         |
| 15              | Heraclenin                         | Heraclenin                  | BioCrick (BCN5187)                  | 98.00         |
| 16              | Pimpinellin                        | Pimpinellin                 | MCE (HY-N0438)                      | 99.27         |
| 17              | Byakangelicol                      | Byakangelicol               | BioCrick (BCN5015)                  | 98.00         |
| 18              | Pranferol                          | Pranferol                   | BenchChem (B192152)                 | 98.00         |
| 19              | Alloimperatorin                    | Alloimperatorin             | BioCrick (BCC8116)                  | 98.00         |
| 20              | Isooxypeucedanin                   | Isooxypeucedanin            | AbMole (M18642)                     | 98.00         |
| 21              | Heracol                            | Byakangelicin               | AOBIOUS (APB0102)                   | 98.00         |
| 22              | Oxypeucedanin                      | Oxypeucedanin               | Sigma (PHL89876)                    | 98.00         |
| 23              | Oxypeucedanin isomer               | Oxypeucedanin               | Sigma (PHL89876)                    | 98.00         |
| 24              | Imperatorin                        | Imperatorin                 | MCE (HY-N0285)                      | 98.00         |
| 25              | Phellopterin                       | Phellopterin                | BioCrick (BCN2637)                  | 98.00         |
| 26              | Isoimperatorin                     | Isoimperatorin              | MCE (HY-N0286)                      | 98.93         |
| 27              | Cnidilin (isophellopterin)         | Cnidilin (isophellopterin)  | AOBIOUS (APB0656)                   | 98.00         |
| 28              | Farnesiferol C                     | Farnesiferol C              | Sigma (SMB01056)                    | 90.00         |
| 29              | Cnidicin                           | Cnidicin                    | Sigma (50014)                       | 95.00         |
| 30              | Auraptene isomer                   | Auraptene                   | Sigma (A9861)                       | 98.00         |
| 31              | Bergamottin isomer                 | Bergamottin                 | Sigma (PHL89868)                    | 95.00         |
| 32              | 8-Geranyloxypsoralen               | 8-Geranyloxypsoralen        | Sigma (CDS010431)                   | 95.00         |
| 33              | Auraptene                          | Auraptene                   | Sigma (A9861)                       | 98.00         |
| 34              | Bergamottin                        | Bergamottin                 | Sigma (PHL89868)                    | 95.00         |
| 35              | Ostruthin                          | Ostruthin                   | Sigma (SMB00113)                    | 95.00         |
| 36              | 5-Geranyl-7-methoxycoumarin        | 5-Geranyl-7-methoxycoumarin | Sigma (52006)                       | 95.00         |
| 38              | 5-Geranyl-7-methoxycoumarin isomer | 5-Geranyl-7-methoxycoumarin | Sigma (52006)                       | 95.00         |

<sup>a</sup> Standards were used in qualitative (<sup>A</sup>) or/and quantitative analysis (<sup>B</sup>). <sup>b</sup> Manufacturers list: AbMole—AbMole BioScience (Houston, TX, USA); AOBIOUS—AOBIOUS Inc. (Gloucester, MA, USA); BenchChem—BenchChem (Austin, TX, USA); BioCrick—BioCrick (Chengdu, Sichuan, PRC); MCE—MCE Med Chem Express (Monmouth, NJ, USA); Sigma—Sigma-Aldrich (St. Louis, MO, USA); Selleck—Selleck Chemicals (Houston, TX, USA).
